# Supplementary material for: Recent advances in multimodal mechanoluminescent sensors enabled by nanostructure design
Source: Royal Society of Chemistry journal article supplement (doi:10.1039/d4nr04875j), 2025-01-01
Supplement: d4nr04875j1.pdf [file d4nr04875j1.pdf]

Supplementary Information (SI) for Nanoscale.  
This journal is © The Royal Society of Chemistry 2025

**Recent advances in multimodal mechanoluminescent sensors enabled by  
nanostructure design**

Zihao Wang,<sup>a</sup> Jiaman Hu,<sup>a</sup> Minglin Yang,<sup>a</sup> Jize Liu\*<sup>a</sup> and Xinxing Zhang\*<sup>b</sup>

<sup>a</sup>School of Materials Science and Engineering, Hainan University (Haikou, 570228, Hainan, China)

<sup>b</sup>State Key Laboratory of Polymer Materials Engineering, Polymer Research Institute, Sichuan University (Chengdu, 610065, China)

\*Corresponding authors: Jize Liu (E-mail address: ljz@hainanu.edu.cn); Xinxing Zhang (E-mail address: xxzwwh@scu.edu.cn)

Table S1 Mechanoluminescence coupled with piezoresistive-response

| Examples | Materials                                                                                                                   | Structures                                                                                        | Sensing mechanisms                                                                   | Performance                                             |
|----------|-----------------------------------------------------------------------------------------------------------------------------|---------------------------------------------------------------------------------------------------|--------------------------------------------------------------------------------------|---------------------------------------------------------|
| Ref. 58  | Polyaniline/metal-doped zinc sulfide/polydimethylsiloxane                                                                   | microcrack structured layer/mechanoluminescent substrate                                          | generation of mechanical microcracks under strain                                    | gauge factor up to 33.8 with a stretchability of 70%    |
| Ref. 59  | carbon nanotubes/fluorescein                                                                                                | strain-dependent microcracks structure upon elastomer                                             | generation of mechanical microcracks under strain                                    | resistance improved approximately fourfold within 10 ms |
| Ref. 60  | Layer structure graphene/SrAl <sub>2</sub> O <sub>4</sub> :Eu <sup>2+</sup> , Dy <sup>3+</sup> /polyurethane                | reduced graphene oxide deposited on cotton fabric/mechanoluminescent polyurethane foamed coating. | controllable positive/negative piezoresistivity and mechanoluminescent coating       | gauge factor from -2.5 to 17                            |
| Ref. 61  | polyurethane / silver nanowires/MXene/Silica-modified SrAl <sub>2</sub> O <sub>4</sub> :Eu <sup>2+</sup> , Dy <sup>3+</sup> | core-shell nanostructured smart fiber                                                             | The strong interfacial interactions between fiber layers results in high sensitivity | gauge factor 12383500                                   |

Table S2 Mechanoluminescence coupled with triboelectric-response

| Examples | Materials                                                                                                 | Structures                                                                                                                                                           | Sensing mechanisms                                                                                                                                      | Performance                                                                                                 |
|----------|-----------------------------------------------------------------------------------------------------------|----------------------------------------------------------------------------------------------------------------------------------------------------------------------|---------------------------------------------------------------------------------------------------------------------------------------------------------|-------------------------------------------------------------------------------------------------------------|
| Ref. 30  | Cr <sup>3+</sup> -doped zinc gallogermanate/polydimethylsiloxane                                          | The triboelectric nanogenerators                                                                                                                                     | trap-controlled luminescence and interfacial electron transfer                                                                                          | Increased force applied in the 0-1 N range produced voltage (0-1V) and ML intensity ( $1 \times 10^5$ CPS). |
| Ref. 68  | organic ML materials (Cz-A6-dye)/ polyacrylamide (PAAm)-LiCl hydrogel/ polycarbonate/Polydimethylsiloxane | organic ML layer/ electrode/ substrate /triboelectrification layer                                                                                                   | interfacial electron transfer                                                                                                                           | High luminance (130% enhancement) and low threshold pressure (57% reduction)                                |
| Ref. 69  | Polydimethylsiloxane/ silver nanowires/ single-electrode TENG; ZnS                                        | transparent single-electrode triboelectric nanogenerator with a ZnS based mechanoluminescence composite.                                                             | Input stimulus signal was converted into output of optical/electrical signals by a periodic contact/separation motion between PDMS film and finger pulp | high output of $V_{oc} = 70$ V and $J_{sc} = 1.5$ mA m <sup>-2</sup> .                                      |
| Ref. 70  | carbon nanotube fiber; ZnS:Cu                                                                             | The fiber sandwiches the carbon nanotube fiber (CNTF) electrode between the core layer of stretchable silicone foam bars and an Ecoflex/ZnS:Cu ML encapsulated layer | electric field-induced charge polarization of the ZnS:Cu fluorescent material during pressure deformation.                                              | ML TENG fiber demonstrates a remarkable non-contact distance of up to 35 cm                                 |
| Ref. 40  | ZnS:Cu; polydimethylsiloxane;                                                                             | a fully self-powered mechanoluminescent-triboelectric bimodal sensor based on micro-                                                                                 | triboelectric nanogenerator for power supply of the ML sensor                                                                                           | a microstructured surface improved triboelectric performances (voltage increases from 8 to 24 V).           |

|         |                                                                                                                                  |                                                               |                                                                        |                                                                                                                                                                       |
|---------|----------------------------------------------------------------------------------------------------------------------------------|---------------------------------------------------------------|------------------------------------------------------------------------|-----------------------------------------------------------------------------------------------------------------------------------------------------------------------|
|         |                                                                                                                                  | nanostructured<br>mechanoluminescent<br>elastomer             |                                                                        |                                                                                                                                                                       |
| Ref. 71 | SrAl <sub>2</sub> O <sub>4</sub> :Eu <sup>2+</sup> :Dy <sup>3+</sup> ;<br>polyvinylidene-<br>fluoride-co-<br>hexafluoropropylene | mechanoluminescent/triboelectric<br>hierarchical<br>structure | triboelectric<br>nanogenerator for<br>power supply of<br>the ML sensor | low force<br>detection limit<br>(0.082 N), high<br>sensitivity (9.69<br>a.u. N <sup>-1</sup> ), fast<br>response (35 ms),<br>and good<br>reliability (5000<br>cycles) |

Table S3 Mechanoluminescence coupled with temperature- or humidity-response

| Examples | Materials                                                                                      | Structures                                                                                                                                                                         | Sensing mechanisms                                                                                                                                                                           | Performance                                                                                                                                               |
|----------|------------------------------------------------------------------------------------------------|------------------------------------------------------------------------------------------------------------------------------------------------------------------------------------|----------------------------------------------------------------------------------------------------------------------------------------------------------------------------------------------|-----------------------------------------------------------------------------------------------------------------------------------------------------------|
| Ref. 84  | ZnS–CaZnOS/<br>poly(3,4-<br>ethylenedioxythiophene):poly(styrene<br>sulfonate)<br>(PEDOT:PSS)  | The temperature sensor composed of a PEDOT:PSS film and copper interdigital electrode is sandwiched between two luminescent layers with ML hybrids embedded in the acrylic polymer | The combined sensing mechanisms of piezo/tribophotonic and thermoresistive effects enable the independent transduction of mechanical and thermal stimuli into optical and electrical signals | The temperature sensitivity was $-0.6\% \text{ } ^\circ \text{C}^{-1}$ , and the force detection limit was 2 N                                            |
| Ref. 31  | SrZnSO:Tb,Eu                                                                                   | hexagonal system (space group P63mc)                                                                                                                                               | piezoresponse and polarization switching behavior                                                                                                                                            | stress–temperature dual-modal imaging method was constructed based on the changes in stress-responsive integral intensity and temperature-responsive IR.  |
| Ref. 59  | 3-aminophenylboronic acid; epoxidized natural rubber; carbon nanotubes; cellulose nanocrystals | a skin-like material via constructing a strain-dependent microcracks structure upon synergistic dynamic-covalent and hydrogen bonds-crosslinked supramolecular elastomer           | When the environmental humidity changes, the water molecules can easily diffuse into the conductive network and thereby give rise to the variation of electric resistance                    | materials exhibit reversible strain-independent luminescence and sensitive resistance response to external stimulus, such as tensile strain and humidity. |
